# Supplementary material for: Highly efficient and thermally stable luminescence of Ca3Gd2Si6O18:Ce3+,Tb3+ phosphors based on efficient energy transfer
Source: Royal Society of Chemistry journal article supplement (doi:10.1039/d0tc04449k), 2020-01-01
Supplement: d0tc04449k1.pdf [file d0tc04449k1.pdf]

## Highly efficient and thermally stable luminescence of $\text{Ca}_3\text{Gd}_2\text{Si}_6\text{O}_{18}:\text{Ce}^{3+}, \text{Tb}^{3+}$ phosphors based on efficient energy transfer

Dan Wu<sup>\*1</sup>, Yu Xiao<sup>2</sup>, Liangliang Zhang<sup>3</sup>, Xiaoling Dong<sup>1</sup>, Shifeng Zhao<sup>1</sup>, Wenping Zhou<sup>1</sup>, Qingshan Lu<sup>1</sup>, Jiahua Zhang<sup>\*3</sup>

<sup>1</sup> School of Physical Science and Technology, Inner Mongolia Key Lab of Nanoscience and Nanotechnology, Inner Mongolia University, Hohhot, 010021, PR China

<sup>2</sup> College of Science, Nanjing Forestry University, Nanjing 210037, China

<sup>3</sup> State Key Laboratory of Luminescence and Applications, Changchun Institute of Optics, Fine Mechanics and Physics, Chinese Academy of Sciences, 3888 Eastern South Lake Road, Changchun 130033, China

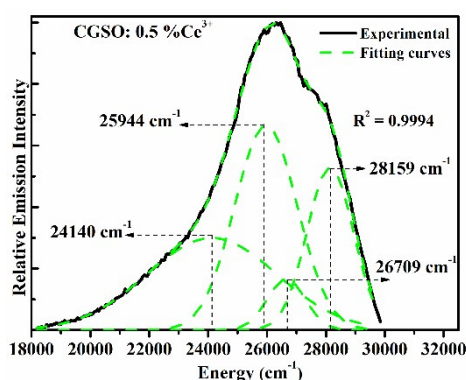

Fig. S1 Gaussian deconvolution of CGSO:0.5%Ce<sup>3+</sup>.

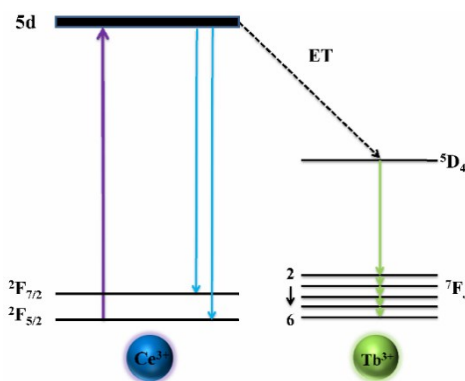

Fig. S2 Energy level diagrams and ET processes of Ce<sup>3+</sup>→Tb<sup>3+</sup>.

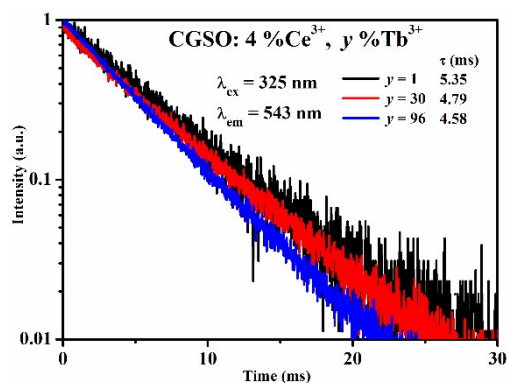

Fig. S3 Fluorescence decay curves of  $Tb^{3+}$  in  $CGSO: 4\%Ce^{3+}, y\%Tb^{3+}$  ( $y = 0, 30, 96$ ) phosphors (excited at 325 nm, monitored at 543 nm).

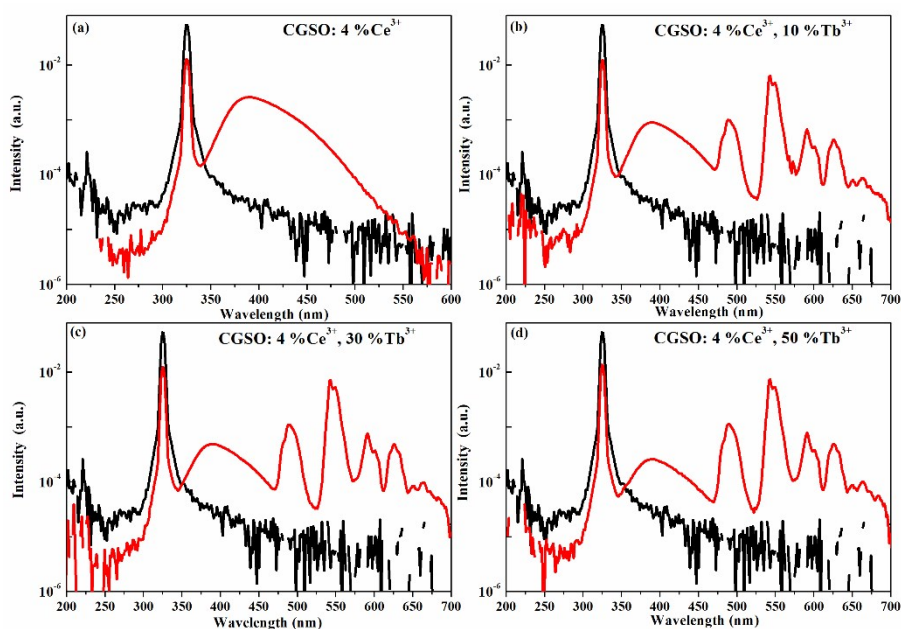

Fig. S4 Emission spectra inside the integrating sphere without (black line) and with (red line) the sample  $CGSO: 4\%Ce^{3+}, yTb^{3+}$  ( $y = 0, 10, 30, 50$ ) upon 325 nm excitation.

**Table S1** The IQE, EQE, the excitation wavelength and the luminescence intensity at 150°C compared with that at room temperature (LI150) of the selected results from reported references.

| samples                                       | IQE (%) | EQE (%) | $\lambda_{ex}$ (nm) | LI150 (%) | Refs.     |
|-----------------------------------------------|---------|---------|---------------------|-----------|-----------|
| $CGSO: 4\%Ce^{3+}, 50\%Tb^{3+}$               | 90.1    | 72.4    | 325                 | 92        | This work |
| $GdBO_3: 0.02Ce^{3+}, 0.12Tb^{3+}$            | 50.1    |         | 361                 |           | [1]       |
| $La_3Si_8N_{11}O_4: 0.01Ce^{3+}, 0.05Tb^{3+}$ | 76.3    | 46.7    | 360                 | 90        | [2]       |

|                                                                                                                               |       |       |      |            |
|-------------------------------------------------------------------------------------------------------------------------------|-------|-------|------|------------|
| $\text{Li}_3\text{Sc}_2(\text{PO}_4)_3: 0.04\text{Ce}^{3+}, 0.005\text{Tb}^{3+}$                                              | 9%    | 285   | 47   | [3]        |
| $\text{Ba}_2\text{Y}_{1.74}(\text{SiO}_4)_3\text{F}: 2\%\text{Ce}^{3+}, 40\%\text{Tb}^{3+}$                                   | 83.12 | 355   | 82   | [4]        |
| $\text{CaScAlSiO}_6: 0.02\text{Ce}^{3+}, 0.12\text{Tb}^{3+}$                                                                  | 79.5  | 330   |      | [5]        |
| $\text{NaBaScSi}_2\text{O}_7: 0.04\text{Ce}^{3+}, 0.04\text{Tb}^{3+}$                                                         | 36    | 349   | 30   | [6]        |
| $\text{Ba}_2\text{Y}_5\text{B}_5\text{O}_{17}: 1\%\text{Ce}^{3+}, 20\%\text{Tb}^{3+}$                                         | 76    | 55    | 345  | 92 [7]     |
| $\text{MgY}_4\text{Si}_3\text{O}_{13}: 0.2\text{Ce}^{3+}, 0.4\text{Tb}^{3+}$                                                  | 49    | 330   |      | [8]        |
| $\text{BaY}_{1.10}\text{Si}_3\text{O}_{10}: 0.05\text{Ce}^{3+}, 0.85\text{Tb}^{3+}$                                           | 81.6  | 337   |      | [9]        |
| $\text{Ca}_2\text{NaSiO}_4\text{F}: 0.03\text{Ce}^{3+}, 0.15\text{Tb}^{3+}$                                                   | 39.3  | 365   | 60   | [10]       |
| $\text{Lu}_5(\text{SiO}_4)_3\text{N}: 0.03\text{Ce}^{3+}$                                                                     | 42.13 | 359   | 80   | [11]       |
| $\text{Na}_3\text{Sc}_2(\text{PO}_4)_3: 0.03\text{Ce}^{3+}, 0.1\text{Tb}^{3+}$                                                | 65    | 320   | 85.6 | [12]       |
| $\text{Ca}_3\text{Gd}(\text{GaO})_3(\text{BO}_3)_4: 0.05\text{Ce}^{3+}, 0.3\text{Tb}^{3+}$                                    | 75.5  | 344   |      | [13]       |
| $\text{Li}_2\text{Ca}_4\text{Si}_4\text{O}_{13}: 0.04\text{Ce}^{3+}, 0.08\text{Tb}^{3+}$                                      | 67.3  | 330   |      | [14]       |
| $\text{Y}_5\text{Si}_3\text{O}_{12}\text{N}: 0.18\text{Ce}^{3+}, 0.4\text{Tb}^{3+}$                                           | 85    | 358   | 80   | [15]       |
| $\text{Sr}_3\text{Gd}_2(\text{Si}_3\text{O}_9)_2: 0.26\text{Ce}^{3+}, 0.1\text{Tb}^{3+}$                                      | 80.2  | 348   |      | [16]       |
| $\text{KSrSc}_2(\text{PO}_4)_3: 0.03\text{Ce}^{3+}, 0.09\text{Tb}^{3+}$                                                       | 66.8  | 310   | 88   | [17]       |
| $\text{Na}_2\text{Ca}_3\text{Si}_2\text{O}_8: 0.04\text{Ce}^{3+}, 0.16\text{Tb}^{3+}$                                         | 85.5  | 330   |      | [18]       |
| $\text{Ca}_3\text{Y}_2(\text{Si}_3\text{O}_9)_2: 15\%\text{Ce}^{3+}, 40\%\text{Tb}^{3+}$                                      | 77    | 329   |      | [19]       |
| $\text{Sr}_3\text{Y}_2(\text{Si}_3\text{O}_9)_2: 0.15\text{Ce}^{3+}, 0.7\text{Tb}^{3+}$                                       | 90.4  | 340   |      | [20]       |
| $\text{Ba}_2\text{Lu}_5\text{B}_5\text{O}_{17}: 1\%\text{Ce}^{3+}, 15\%\text{Tb}^{3+}$                                        | 86    | 348   | 90   | [21]       |
| $\text{Sr}_3\text{Lu}(\text{PO}_4)_3: 0.04\text{Ce}^{3+}, 0.2\text{Tb}^{3+}$                                                  | 67.2  | 310   |      | [22]       |
| $\text{Y}_{0.82}\text{Ce}_{0.03}\text{Tb}_{0.15}\text{BO}_3$                                                                  | 76.7  | 361   | 87   | [23]       |
| $(\text{La}_{0.86}\text{Ce}_{0.04}\text{Tb}_{0.1})\text{PO}_4$                                                                | 84.67 | 275   |      | [24]       |
| $\text{Ba}_3\text{Lu}_2\text{B}_6\text{O}_{15}: 0.03\text{Ce}^{3+}, 0.2\text{Tb}^{3+}$                                        | 51    | 373   | 54   | [25]       |
| $[\text{Mg}_{1.25}\text{Si}_{1.25}\text{Al}_{2.5}]\text{O}_3\text{N}_3: 0.03\text{Ce}^{3+}, 0.2\text{Tb}^{3+}$                | 41.14 | 335   | 65   | [26]       |
| $\text{Ca}_6\text{Ba}(\text{PO}_4)_4\text{O}: 0.03\text{Ce}^{3+}, 0.01\text{Tb}^{3+}$                                         | 79.6  | 365   | 82   | [27]       |
| $\text{BaLu}_2\text{SiO}_3: 0.06\text{Ce}^{3+}, 0.02\text{Tb}^{3+}$                                                           | 71.0  | 365   | 97   | [28]       |
| $\text{BaGd}_2\text{Si}_3\text{O}_{10}: 0.04\text{Ce}^{3+}, 0.4\text{Tb}^{3+}$                                                | 62    | 336   | 44   | [29]       |
| $\text{La}_2\text{Si}_2\text{O}_7: 0.05\text{Ce}^{3+}, 0.6\text{Tb}^{3+}$                                                     | 96    | 332   | 89   | [30]       |
| $\text{Sr}_3\text{Lu}_2(\text{BO}_3)_4: 3\%\text{Ce}^{3+}, 8\%\text{Tb}^{3+}$                                                 | 77.5  | 34.8  | 340  | 70 [31]    |
| $\text{Ba}_3\text{Y}_2\text{B}_6\text{O}_{15}: 0.03\text{Ce}^{3+}, 0.3\text{Tb}^{3+}$                                         | 49    | 365   | 22   | [32]       |
| $\text{La}_8\text{Ba}_2(\text{Si}_4\text{P}_2\text{O}_{22}\text{N}_2)\text{O}_2: 0.005\text{Ce}^{3+}, 0.1\text{Tb}^{3+}$      | 89    | 290   | 91.2 | [33]       |
| $\text{La}_{0.59}\text{Al}_{2.03}\text{B}_4\text{O}_{10.54}: 0.06\text{Ce}^{3+}, 0.35\text{Tb}^{3+}$                          | 40.9  | 310   | 56   | [34]       |
| $\text{NaBa}_4(\text{AlB}_4\text{O}_9)_2\text{Cl}_3: 0.09\text{Ce}^{3+}, 0.13\text{Tb}^{3+}$                                  |       | 43.38 | 323  | 95.22 [35] |
| $\text{Sr}_2\text{MgB}_2\text{O}_6: 0.05\text{Ce}^{3+}, 0.05\text{Tb}^{3+}$                                                   | 66.39 | 48.92 | 323  | 75.3 [36]  |
| $\text{Ca}(\text{Mg}_{0.8}\text{Al}_{0.2})(\text{Si}_{1.8}\text{Al}_{0.2})\text{O}_6: 0.03\text{Ce}^{3+}, 0.03\text{Tb}^{3+}$ | 36.81 | 340   | 70.5 | [37]       |
| $\text{Ca}_2\text{YHf}_2\text{Al}_3\text{O}_{12}: 0.03\text{Ce}^{3+}, 0.6\text{Tb}^{3+}$                                      | 78.5  | 56    | 408  | 43.3 [38]  |
| $\text{Al}_5\text{O}_6\text{N}: 0.003\text{Eu}^{2+}, 0.01\text{Tb}^{3+}$                                                      | 11.1  | 330   | 51   | [39]       |
| $\text{Sr}_3\text{NaSc}(\text{PO}_4)_3\text{F}: 0.03\text{Eu}^{2+}, 0.5\text{Tb}^{3+}$                                        | 9.4   | 365   | 67   | [40]       |

**Table S2** Rietveld refinement, crystallographic and structure parameters of the representative samples CGSO: 4%Ce<sup>3+</sup>.

| Compound    | $x = 0$         |
|-------------|-----------------|
| Space group | $\text{P6}_3/m$ |

|                       |            |
|-----------------------|------------|
| $a$ (Å)               | 13.4025(1) |
| $b$ (Å)               | 7.7878(1)  |
| $c$ (Å)               | 14.8698(5) |
| $\alpha$ (deg)        | 90         |
| $\beta$ (deg)         | 90.25      |
| $\gamma$ (deg)        | 90         |
| $V$ (Å <sup>3</sup> ) | 1552.049   |
| $Z$                   | 4          |
| $R_p$ (%)             | 5.45       |
| $R_{wp}$ (%)          | 8.02       |
| $R_{exp}$ (%)         | 3.55       |
| $\chi^2$              | 5.10       |

According to Dexter's ET expressions of multipolar interactions and Reisfeld's approximation, the following relation can be obtained <sup>[41]</sup>:

$$\frac{\eta_0}{\eta} = C^{n/3} \quad (S1)$$

where  $C$  is the total doping concentration of Ce<sup>3+</sup> and Tb<sup>3+</sup>,  $\eta_0$  and  $\eta$  are the quantum efficiencies of Ce<sup>3+</sup> in the absence and presence of Tb<sup>3+</sup>,  $n = 6, 8,$  and  $10$  corresponding to dipole–dipole, dipole–quadrupole and quadrupole–quadrupole interactions, respectively. The value  $\eta_0/\eta$  can be approximately estimated by the ratio of related emission intensities as <sup>[27]</sup>:

$$\frac{I_0}{I} = C^{n/3} \quad (S2)$$

where  $I_0$  and  $I$  are the emission intensities of Ce<sup>3+</sup> in the absence and presence of Tb<sup>3+</sup>. The plots of  $I_0/I$  versus  $C^{n/3}$  are presented in Fig. S5. The best linear relationship can be achieved at  $n = 8$ , implying that the dipole–quadrupole interaction governs the ET process from Ce<sup>3+</sup> to Tb<sup>3+</sup>.

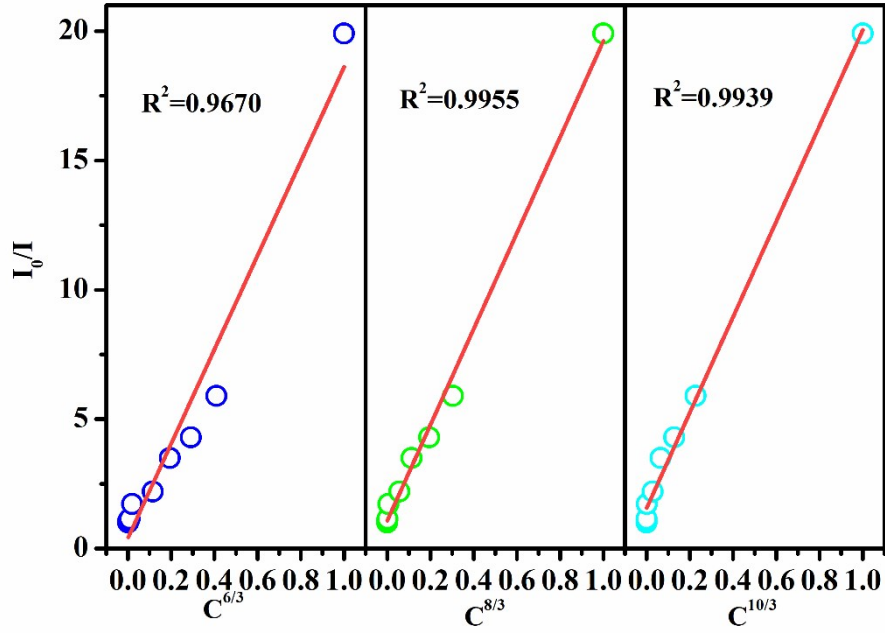

Fig. S5 Dependence of  $I_0/I$  of  $Ce^{3+}$  on  $C^{6/3}$ ,  $C^{8/3}$  and  $C^{10/3}$ .

The ET efficiency  $\eta_{ET}$  from  $Ce^{3+}$  to  $Tb^{3+}$  can be calculated based on the effective lifetime by using the following equation:

$$\eta_{ET} = 1 - \frac{\tau}{\tau_0} \quad (S3)$$

where  $\tau$  and  $\tau_0$  are the lifetimes of  $Ce^{3+}$  in the presence and in the absence of  $Tb^{3+}$ , respectively.

The calculated ET efficiencies from  $Ce^{3+}$  to  $Tb^{3+}$  using Eq. S1 were given in Table S3.

The energy transfer efficiency from  $Ce^{3+}$  to  $Tb^{3+}$ ,  $\eta'_{ET}$  can be calculated based on the  $Tb^{3+}$  concentration dependence of the emission intensity of  $Ce^{3+}$  shown in Fig. 4, by using the following Equation:

$$\eta'_{ET} = 1 - \frac{I}{I_0} \quad (S4)$$

where  $I_0$  and  $I$  are the emission intensities of  $Ce^{3+}$  in the absence and in the presence of  $Tb^{3+}$ , respectively. The calculated ET efficiencies from  $Ce^{3+}$  to  $Tb^{3+}$  using Eq. S2 were given in Table S3.

**Table S3** Calculated energy transfer efficiencies of CGSO: 4% $Ce^{3+}$ ,  $y\%Tb^{3+}$  ( $x=0-96$ ).

| $y$ | $\eta_{ET} = 1 - I/I_0$ (%) | $\eta'_{ET} = 1 - \tau/\tau_0$ (%) |
|-----|-----------------------------|------------------------------------|
| 0   | 0                           | 0                                  |
| 1   | 0.07                        | 0.09                               |

|    |      |      |
|----|------|------|
| 5  | 0.08 | 0.13 |
| 10 | 0.15 | 0.41 |
| 30 | 0.32 | 0.55 |
| 40 | 0.43 | 0.71 |
| 50 | 0.54 | 0.77 |
| 60 | 0.57 | 0.83 |
| 96 | 0.63 | 0.96 |

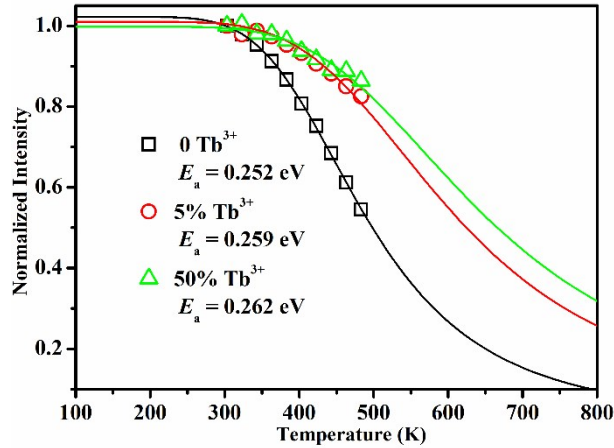

Fig. S6 Plots of normalized total emission intensities versus temperatures for CGSO: 4%Ce<sup>3+</sup>, y%Tb<sup>3+</sup> (y = 0, 5, 50).

The activation energy  $\Delta E_a$  was calculated using the Arrhenius equation given as <sup>[42]</sup>:

$$I(T) = \frac{I_0}{1 + Ae^{(-\Delta E_a/k_B T)}}$$

where  $I_0$  is the initial total emission intensity of the phosphor at absolute zero,  $I(T)$  is the total emission intensity at a given temperature  $T$ ,  $A$  is a constant,  $\Delta E_a$  is the activation energy for thermal quenching, and  $k_B$  is the Boltzmann constant ( $8.617 \times 10^{-5}$  eV K<sup>-1</sup>). Fig. S6 depicts the plots of normalized total emission intensities versus temperatures for CGSO: 4%Ce<sup>3+</sup>, y%Tb<sup>3+</sup> (y = 0, 5, 50). Through the best fit using the Arrhenius equation,  $\Delta E_a$  were obtained to be 0.252 eV, 0.259 eV, and 0.262 eV for CGSO: 4%Ce<sup>3+</sup>, y%Tb<sup>3+</sup> (y = 0, 5, 50), respectively.

## REFERENCES

1. D. Wen, J. Shi, M. Wu, Q. Su, *ACS Appl. Mater. Inter.* 2014, **6**, 10792.
2. H. B. Xu, W. D. Zhuang, R. H. Liu, Y. H. Liu, T. L. Zhou, Y. Cho, W. Gao, C. P. Yan, N.

- Hirosaki, R. J. Xie, *RSC Adv.* 2018, **8**, 35271.
3. M. Jiao, Q. Xu, M. Liu, C. Yang, Y. Yu, *Phys. Chem. Chem. Phys.* 2018, **20**, 26995.
4. D. Wu, W. Xiao, L. Zhang, X. Zhang, Z. Hao, G. H. Pan, Y. Luo, J. Zhang, *J. Mater. Chem. C* 2017, **5**, 11910.
5. W. Lü, N. Guo, Y. Jia, Q. Zhao, W. Lv, M. Jiao, B. Shao, H. You, *Inorg. Chem.* 2013, **52**, 3007.
6. G. Li, Y. Wang, W. Zeng, W. Chen, S. Han, H. Guo, Y. Li, *J. Mater. Chem. C* 2016, **4**, 3304.
7. Y. Xiao, Z. Hao, L. Zhang, W. Xiao, D. Wu, X. Zhang, G. H. Pan, Y. Luo, J. Zhang, *Inorg. Chem.* 2017, **56**, 4538.
8. H. Y. Chung, C. H. Lu, C. H. Hsu, *J. Am. Ceram. Soc.* 2010, **93**, 1838.
9. Z. Xia, Y. Liang, D. Yu, M. Zhang, W. Huang, M. Tong, J. Wu, J. Zhao, *J. Opt. Laser Technol.* 2014, **56**, 387.
10. M. Jiao, Y. Jia, W. Lü, W. Lv, Q. Zhao, B. Shao, H. You, *J. Mater. Chem. C* 2014, **2**, 4304.
11. Q. Guo, Q. Wang, L. Jiang, L. Liao, H. Liu, L. Mei, *Phys. Chem. Chem. Phys.* 2016, **18**, 15545.
12. H. Guo, B. Devakumar, B. Li, X. Huang, *Dyes Pigments* 2018, **151**, 81.
13. B. Li, X. Huang, *Ceram. Int.* 2018, **44**, 4915.
14. X. Kang, S. Lu, H. Wang, D. Ling, W. Lü, *ACS Omega* 2018, **3**, 16714.
15. S. A. Khan, N. Z. Khan, W. W. Ji, L. Ali, H. Abadikhah, L. Hao, X. Xu, S. Agathopoulos, Q. Khan, L. Zhu, *Dyes Pigments* 2019, **160**, 675.
16. Y. Zhu, Y. Liang, M. Zhang, M. Tong, G. Li, S. Wang, *RSC Adv.* 2015, **5**, 98350.
17. M. Jiao, W. Lv, W. Lü, Q. Zhao, B. Shao, H. You, *Dalton T.* 2015, **44**, 4080.
18. W. Lü, H. Xu, J. Huo, B. Shao, Y. Feng, S. Zhao, H. You, *Dalton T.* 2017, **46**, 9272.
19. Y. C. Chiu, W. R. Liu, Y. T. Yeh, S. M. Jang, T. M. Chen, *J. The Electrochem. Soc.* 2009, **156**, J221.
20. M. Zhang, Y. Liang, R. Tang, D. Yu, M. Tong, Q. Wang, Y. Zhu, X. Wu, G. Li, *RSC Adv.* 2014, **4**, 40626.
21. Y. Xiao, Z. Hao, L. Zhang, X. Zhang, G. H. Pan, H. Wu, H. Wu, Y. Luo, S. Zhang, J. Zhang, *J. Mater. Chem. C* 2018, **6**, 5984.
22. Z. Yang, D. Xu, J. Sun, J. Du, X. Gao, *Mat. Sci. Eng. B* 2016, **211**, 13-19.
23. R. Sato, S. Takeshita, T. Isobe, T. Sawayama, S. Niikura, *ECS J. Solid State Sc.* 2012, **1**, R163.

24. Z. Wang, Q. Zhu, X. Wang, X. Li, X. Sun, B. N. Kim, J. G. Li, *Inorg. Chem.* 2018, **58**, 890.
25. X. Huang, H. Guo, L. Sun, T. Sakthivel, Y. Wu, *J. Alloys Compds.* 2019, **787**, 865.
26. J. Li, X. Zhou, J. Ding, X. Zhou, Y. Wang, *J. Mater. Chem. C* 2019, **7**, 2257.
27. M. Chen, Z. Xia, Q. Liu, *J. Mater. Chem. C* 2015, **3**, 4197.
28. K. Li, S. Liang, H. Lian, M. Shang, B. Xing, J. Lin, *J. Mater. Chem. C* 2016, **4**, 3443.
29. V. Rajagopal, X. Huang, Y. Wu, *ACS Omega* 2019, **4**, 4384.
30. W. Ma, J. Zhang, X. Zhang, X. Zhang, Y. Liu, S. Liao, S. Lian, *J. Alloys Compds.* 2019, **785**, 53.
31. Y. Zhang, X. Zhang, H. Zhang, Z. C. Wu, Y. Liu, L. Ma, X. Wang, W. R. Liu, B. Lei, *J. Alloys Compds.* 2019, **789**, 215.
32. B. Li, J. Liang, L. Sun, S. Wang, Q. Sun, B. Devakumar, G. Annadurai, D. Chen, X. Huang, Y. Wu, *J. Lumin.* 2019, **211**, 388.
33. L. Dong, L. Zhang, Y. Jia, B. Shao, W. Lv, S. Zhao, H. You, *Cryst. Eng. Comm.* 2019, **21**, 6226.
34. F. Junqin, J. Cao, Z. Li, Z. Li, J. Li, J. Lin, F. Wu, *Ceram. Int.* 2019, **45**, 20316.
35. W. Zhang, Y. Liang, Y. Zhu, S. Liu, H. Li, W. Lei, *J. Am. Ceram. Soc.* 2019, **102**, 5223.
36. Q. Dong, J. Yang, J. Cui, F. Xu, F. Yang, J. Peng, F. Du, X. Ye, S. Yang, *Dalton T.* 2020, **49**, 1935.
37. Z. An, S. Che, Y. Song, X. Zhang, R. Dong, D. Zhang, X. Zhou, Z. Shi, H. Zou, *Inorg. Chem.* 2020, **59**, 4790-4799.
38. S. Wang, B. Devakumar, Q. Sun, J. Liang, L. Sun, X. Huang, *J. Mater. Chem. C* 2020, **8**, 4408-4420.
39. Q. Dong, J. Cui, Y. Tian, F. Yang, H. Ming, F. Du, J. Peng, X. Ye, *J. Lumin.* 2019, **212**, 146.
40. Z. Yang, C. Ji, G. Zhang, G. Han, H. Wang, H. Bu, X. Tan, D. Xu, J. Sun, *J. Lumin.* 2019, **206**, 585.
41. D. L. Dexter, *J. Chem. Phys.* 1953, **21**, 836.
42. W. Xiao, X. Zhang, Z. Hao, G. H. Pan, Y. Luo, L. Zhang, J. Zhang, *Inorg. Chem.* 2015, **54**, 3189.
